# Supplementary material for: Nomogram for pre-procedural prediction of non-curative endoscopic resection in patients with early gastric cancer
Source: Springer Nature journal article supplement (doi:10.1007/s00464-023-09949-0), 2023-02-28
Supplement: MOESM1 [file 24074666]

Original Article

## **Nomogram for pre-procedural prediction of non-curative endoscopic resection in patients with early gastric cancer**

**So Young Han<sup>1\*</sup>, Hong Jin Yoon<sup>2</sup>, Jie-Hyun Kim<sup>1</sup>, Hye Sun Lee<sup>3</sup>, Jaeyoung Chun<sup>1</sup>,  
Young Hoon Youn<sup>1</sup>, HyoJin Park<sup>1</sup>**

<sup>1</sup>Department of Internal Medicine, Gangnam Severance Hospital, Yonsei University College of Medicine, Seoul, Korea

<sup>2</sup>Department of Internal Medicine, Soonchunhyang University College of Medicine, 31 Suncheonhyang 6-gil, Dongnam-gu, Cheonan, Republic of Korea

<sup>3</sup>Biostatistics Collaboration Unit, Yonsei University College of Medicine, Seoul, Korea

**Short running head:** Nomogram for prediction of non-CR

**Correspondence to:** Jie-Hyun Kim, MD, PhD

**Address:** Department of Internal Medicine, Gangnam Severance Hospital, Yonsei University College of Medicine, 211 Eonjuro, Gangnam-gu, Seoul, Korea, 135-720

**Phone:** 82-2-2019-3505

**Fax:** 82-2-3463-3882

**E-mail:** [otilia94@yuhs.ac](mailto:otilia94@yuhs.ac)

**Supplementary Fig 1.** Abnormal CT findings of the early gastric cancer: **a** Fold thickening; **b** Non-specific lymph node enlargement

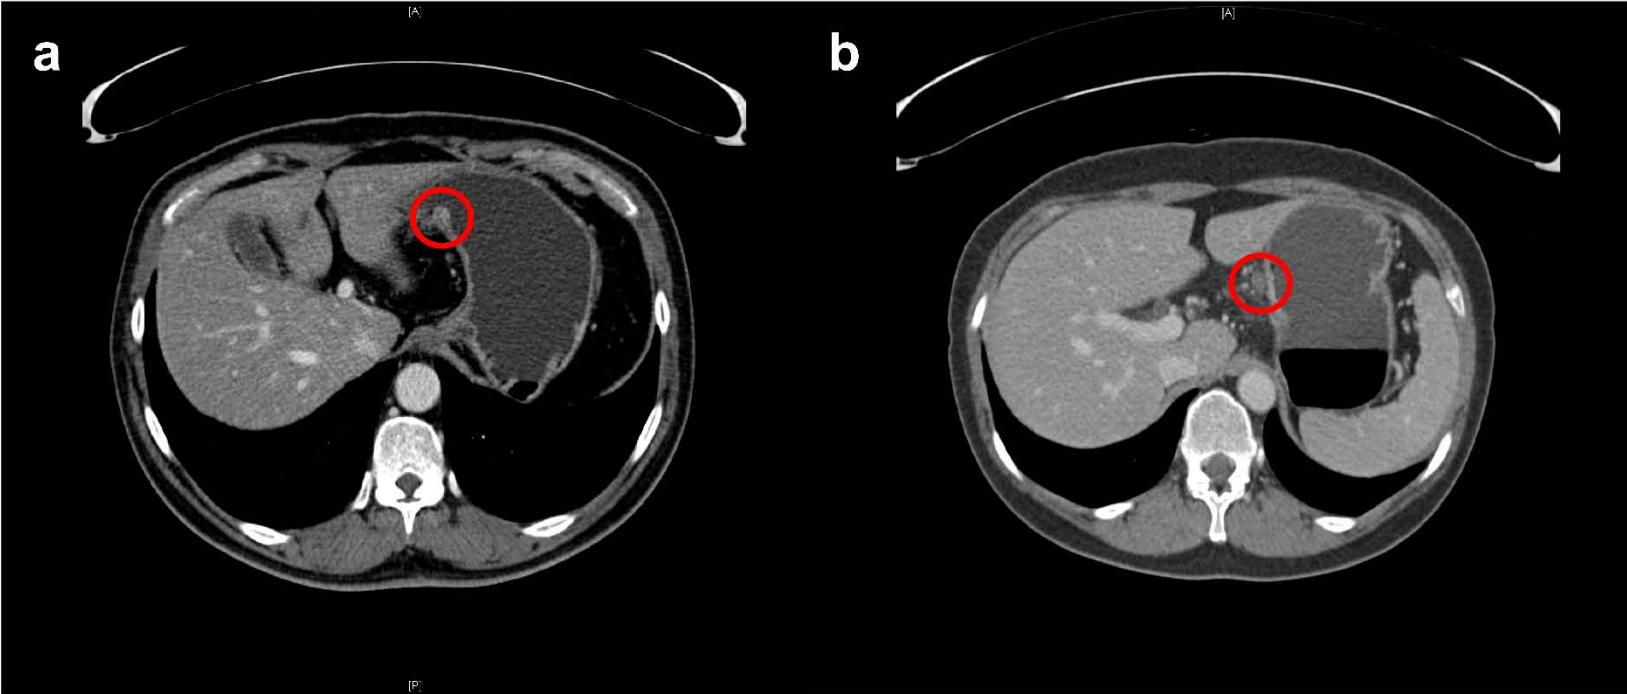

**Supplementary Figure 2.** Real-world example of nomogram use : A real-world application of the nomogram is depicted herein. Each variable was assessed, and the predicted probability of non-CR was calculated using our model. The patient’s post-ESD pathologic report revealed non-CR due to vertical margin involvement and lymphovascular invasion.

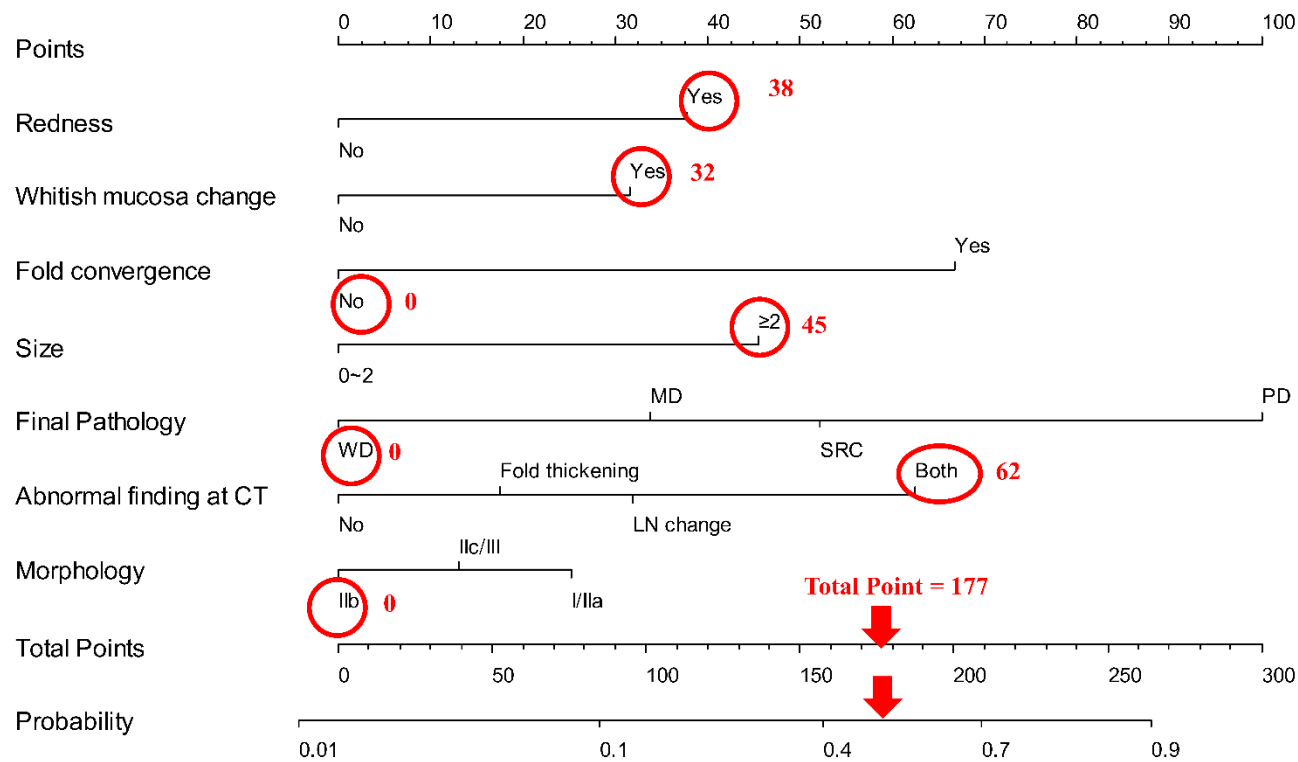

Abbreviations: *WD* well-differentiated; *MD* moderately differentiated; *SRC* signet ring cell carcinoma; *PD* poorly differentiated; *CT* computed tomography; *LN* lymph node

**Supplementary Figure 3.** Nomogram predicting the risk of non-curative resection in differentiated-type histology

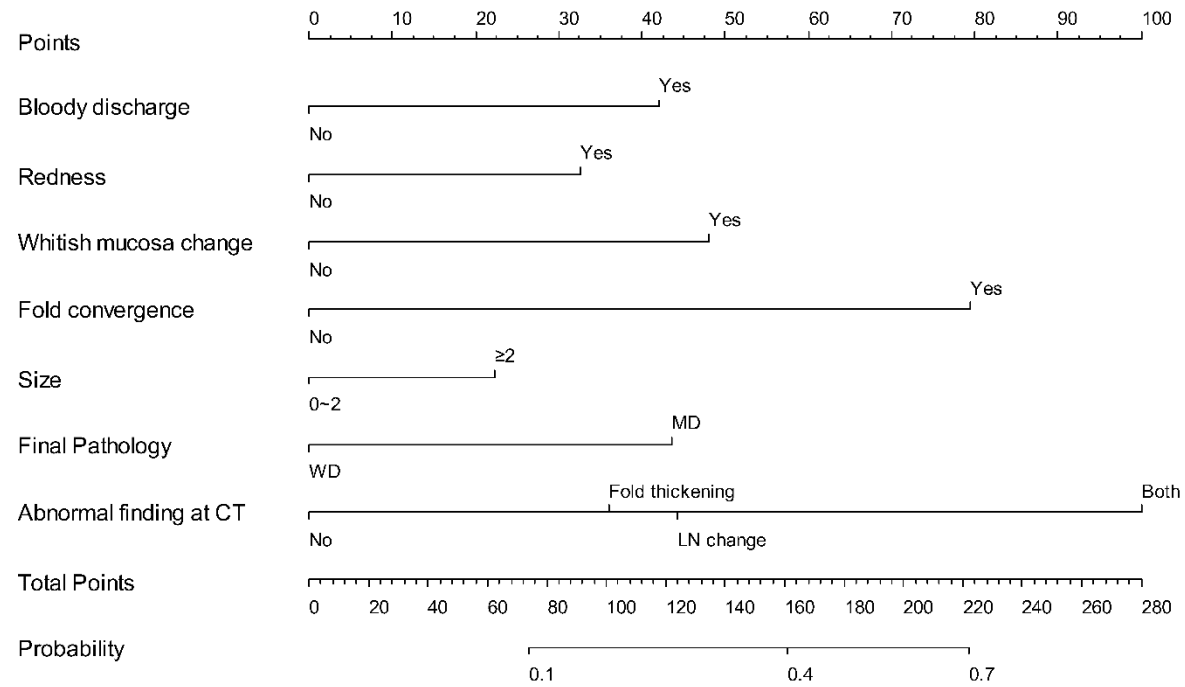

Abbreviations: *WD*, well-differentiated; *MD*, moderately differentiated; *CT* computed tomography; *LN* lymph node

**Supplementary Figure 4.** Nomogram predicting the risk of non-curative resection in undifferentiated-type histology

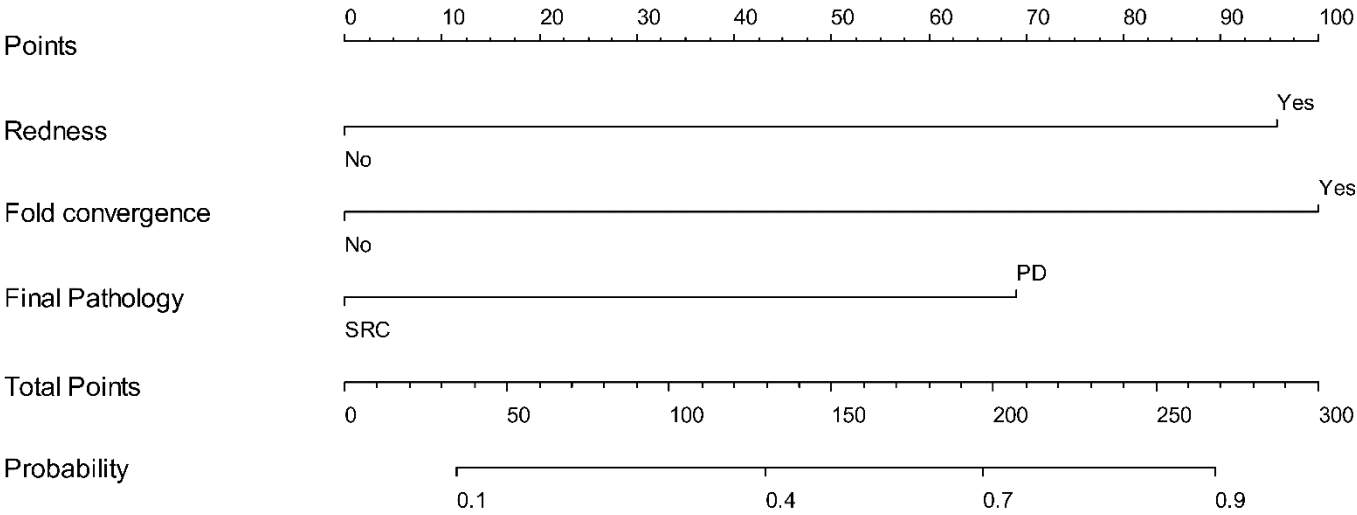

Abbreviations: *SRC* signet ring cell carcinoma; *PD* poorly differentiated

**Supplementary Figure 5.** Receiver operating characteristic (ROC) curves of differentiated- and undifferentiated-type histology in the development set: **a** Receiver operating characteristics (ROC) curve of the differentiated-type histology; **b** Receiver operating characteristics (ROC) curve of the undifferentiated-type histology

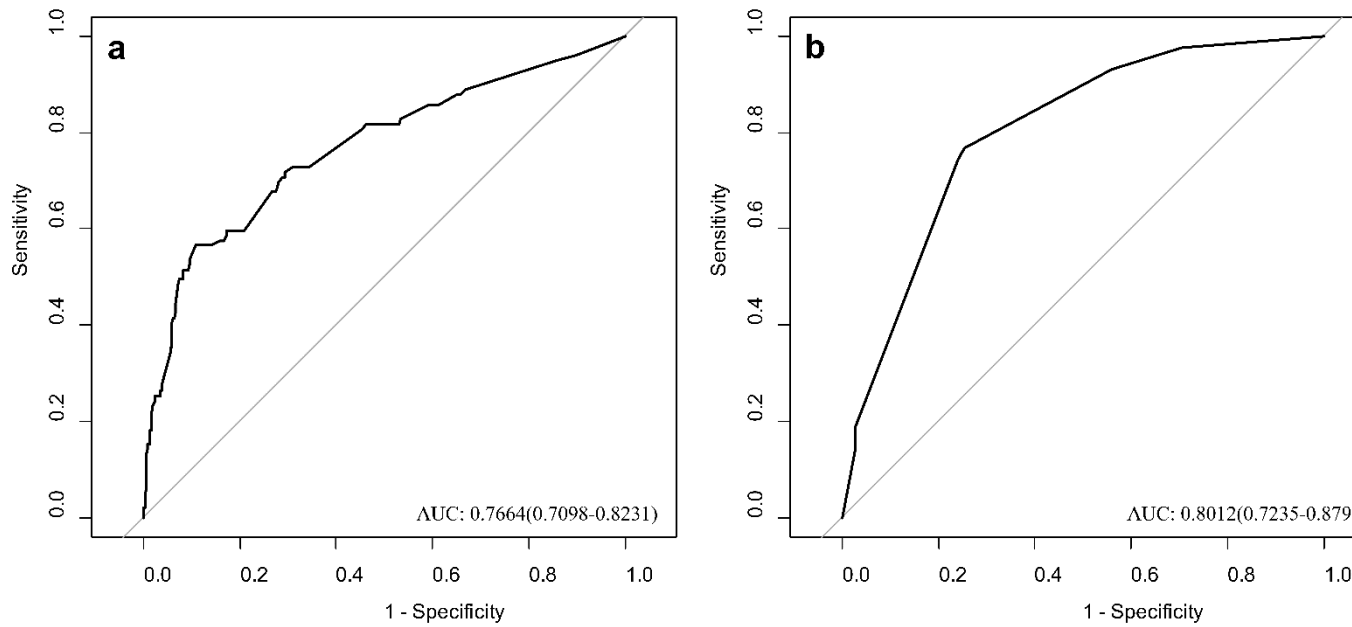

Abbreviation: *AUC* area under the curve

**Supplementary Figure 6.** Receiver operating characteristic (ROC) curves of differentiated- and undifferentiated-type histology in the external validation set: **a** Receiver operating characteristics (ROC) curve of the differentiated-type histology; **b** Receiver operating characteristics (ROC) curve of the undifferentiated-type histology

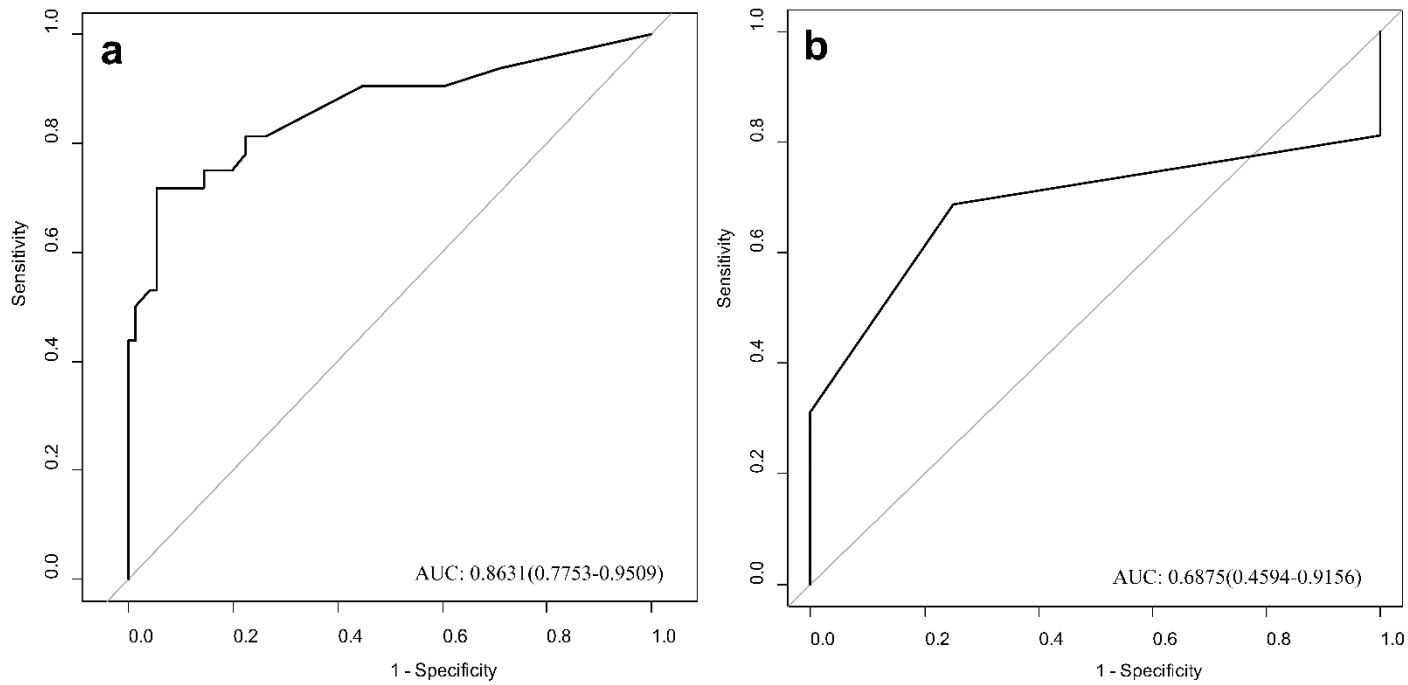

Abbreviation: *AUC* area under the curve
